# Supplementary material for: Functional characterization of a class III acid endochitinase from the traps of the carnivorous pitcher plant genus, Nepenthes
Source: PubMed Central journal article supplement — J Exp Bot. 2011 Jun 1;62(13):4639–47. doi: 10.1093/jxb/err173 (PMC3170555; doi:10.1093/jxb/err173), 2011-06-01
Supplement: supp_err173_00061119-file001.pdf [file supp_err173_00061119-file001.pdf]

## Functional characterization of a class III acid endochitinase from the traps of the carnivorous pitcher plant genus, *Nepenthes*

Sandy Rottloff, Regina Stieber, Heiko Maischak, Florian G Turini, Günther Heubl, and Axel Mithofer

**Fig. S1.** Amino acid sequence alignment of endochitinases from various species. The amino acid sequence alignment and the deduced consensus sequence was generated using Clustal X involving the plant species *Pyrus pyrifolia*; *Lupinus albus*; *Cucumis sativus*; *Nepenthes rafflesiana*; *Beta vulgaris*; *Vitis vinifera*; *Oryza sativa*.

|                |   |                                  |               |         |         |         |         |        |             |               |             |
|----------------|---|----------------------------------|---------------|---------|---------|---------|---------|--------|-------------|---------------|-------------|
| P. pyrifolia   | 1 | MASKTQTLALTLSELLILISS-CKSSQAAG-  | IAIYWGQNGNEGT | LADACN  | SGNYQFV | NIAFLIT | FGNNQT  | PVNL   | LAGH        | CDPASGTCTGLSA |             |
| L. albus       | 1 | MASLKQVSLILFPPLLLLLISSFFKLSNAAG- | IVIYWGQNGNEGS | LADACN  | TNNYQYV | NIAFLST | FGNGQT  | PELNL  | LAGHSR----- | DGLNA         |             |
| C. sativus     | 1 | MAAHKIT--TTLISFFLLSSIFRSSDAAG-   | IAIYWGQNGNEGS | LASTCAT | GNIEFV  | NIAFLSS | FGSGQAP | PVNL   | LAGHCNP     | PDNNGCAFLSD   |             |
| N. rafflesiana | 1 | MKTHYSSAILPILTLFVFLS-INPSHGSG-   | IAYWGQNGNEGT  | LSDTCAT | GNYNV   | LVSLTT  | FGNGQT  | PVNL   | LAGHCD      | PSSNGCTGLST   |             |
| B. vulgaris    | 1 | MAAKIVS--VLFLISLLIFASFESSHGSG-   | IVIYWGQNGDEGS | LADTCN  | SGNYGT  | VILAF   | VATFG   | NGQT   | PALNL       | LAGHCD        | PATN-CNSLSS |
| V. vinifera    | 1 | MARTPQS--TPLLISLSVLALLQTSYAGG-   | IAIYWGQNGNEGT | LTQTCT  | NTGKY   | SVVNI   | AFLNK   | FGNGQT | PELNL       | LAGHCNP       | PASNGCTSVST |
| O. sativa      | 1 | MTSRMFSAMQMLIMVVVALAGLAAGTRAGD-  | IAIYWGQNGNEGT | LAQTCAT | GNRFR   | VIVAF   | FLPV    | FGKGQT | PVNL        | LAGHCD        | PASNGCTGVGA |
| consensus      | 1 | *                                | *             | *       | *       | *       | *       | *      | *           | *             |             |

  

|                |    |                               |        |        |        |       |      |       |       |        |        |        |       |    |           |           |      |    |      |
|----------------|----|-------------------------------|--------|--------|--------|-------|------|-------|-------|--------|--------|--------|-------|----|-----------|-----------|------|----|------|
| P. pyrifolia   | 89 | DTRTCQSKNIKVLLSIGGGAGSGSYSLTS | SADDAR | QVADY  | IWNNFL | LGGQ  | SASR | PLGDA | VLDG  | VDFDIE | AGGGQ  | FYDEL  | LARS  | LN | GHNGQA--- | K         |      |    |      |
| L. albus       | 84 | DIKGCQGGKIKVLLSLGGGAGSYSLNS   | ADDAT  | NLANYL | WNNFL  | LGGT  | SDSR | PLGDA | VLDG  | IDFDIE | EAGGA  | QHYDE  | LARAL | LN | GFSSQK--- | K         |      |    |      |
| C. sativus     | 88 | EINSCKSQNVKVLLSIGGGAGSYSLS    | ADDAK  | QVANF  | IWNSY  | LGGQ  | SDSR | PLGAA | VLDG  | VDFDIE | SGSG   | QFWDV  | LAQEL | KN | FG-----   |           |      |    |      |
| N. rafflesiana | 89 | DITSQONQGIKVLLSLGGGAGSYSLV    | STDDA  | DQVA   | AAYL   | WNNY  | LGGQ | SDSR  | PLGSA | VLDG   | IDFDIE | SGSD   | NYWGD | LA | TAL       | KNYS----- | Q    |    |      |
| B. vulgaris    | 87 | DIKTCQQAGIKVLLSIGGGAGGYSL     | STDDA  | NFADY  | LWNTY  | LGGQ  | SSR  | PLGDA | VLDG  | IDFDIE | SGDR   | FWDD   | LARAL | LN | AGHNGQ--- | K         |      |    |      |
| V. vinifera    | 88 | GIRNCQNRGIKVMLSIGGGAGSYSL     | SSNDA  | QNVAN  | YLWNN  | FLGGQ | SSR  | PLGDA | VLDG  | IDFDIE | LGST   | TLHDD  | LARAL | LS | RIEFQ     | QERGR     |      |    |      |
| O. sativa      | 91 | DIKSCQSLGIKVMFSIGGGVGN        | YGLSS  | RDDAK  | QVA    | AAYL  | WNNY | LGGT  | SPSR  | PLGDA  | VMDG   | IDFDIE | SGGM  | Y  | WDD       | LARYL     | KAYS | RQ | GSSK |
| consensus      | 91 | *                             | *      | *      | *      | *     | *    | *     | *     | *      | *      | *      | *     | *  | *         | *         | *    | *  |      |

  

|                |     |                             |           |          |      |       |       |      |     |       |       |       |      |      |      |          |          |        |        |   |
|----------------|-----|-----------------------------|-----------|----------|------|-------|-------|------|-----|-------|-------|-------|------|------|------|----------|----------|--------|--------|---|
| P. pyrifolia   | 176 | TVYLAAPQCFIPDAHLDGAIQTGLFDY | VWVQFYNN  | PPCQ     | YADG | -NANA | FLNS  | WSQ  | WAS | -VPAT | QVFM  | G     | LPAS | TDA  | AGSG | -FIPADAL | KS       |        |        |   |
| L. albus       | 171 | -VYLGAAPOCFIPDAHLDAAIN      | TGLFDY    | VWVQFYNN | PPCQ | YACG  | -NTNN | FLNS | WNQ | WTS   | -SQAK | QVFL  | G    | LPAS | EAA  | APSG     | GFIP     | TDV    | LIS    |   |
| C. sativus     | 171 | QVILSAAPOCFIPDAHLDAAI       | KTGLFDY   | VWVQFYNN | PPCM | FAD   | --NAD | NLSS | WNQ | WTA   | -FPTS | KLYM  | G    | LPAS | EAA  | APSG     | GFIP     | ADV    | LIS    |   |
| N. rafflesiana | 173 | SVLVSAAPOCFIPDAHLDLAI       | ATGTFDY   | VWVQFYNN | EQCE | YVT   | --DDT | NLSA | WNQ | WTS   | -SQAN | VVFL  | G    | LPAS | TDA  | ASSG     | -YISP    | DV     | LIS    |   |
| B. vulgaris    | 174 | TVYLSAAPQCFIPDASLSTAI       | ATGTFDY   | VWVQFYNN | PPCQ | YDT   | --SAD | NLSS | WNQ | WTT   | -VQAN | QIFL  | G    | LPAS | TDA  | AGSG     | -FIPADAL | TS     |        |   |
| V. vinifera    | 178 | KVYLTAAPQCFIPDKVPGTAL       | NTGTFDY   | VWVQFYNN | PPCQ | YSSG  | -NTNN | FLNS | WN  | RWT   | SSIN  | STG   | SFM  | G    | LPAS | SA       | AAGR     | -FIPAN | VLT    |   |
| O. sativa      | 181 | PVYLTAAPOCFIPDASLGV         | ALSTGTFDY | VWVQFYNN | PPCQ | YSSS  | NGVGN | LSA  | W   | KQ    | WTS   | -IPAG | R    | VFL  | G    | LPVA     | EAA      | AGSG   | -FVETS | D |
| consensus      | 181 | *                           | *         | *        | *    | *     | *     | *    | *   | *     | *     | *     | *    | *    | *    | *        | *        | *      | *      |   |

  

|                |     |      |     |      |      |      |      |    |     |    |   |    |    |     |   |
|----------------|-----|------|-----|------|------|------|------|----|-----|----|---|----|----|-----|---|
| P. pyrifolia   | 263 | QVLP | TIK | NSAK | YGGV | MLWS | SR   | YD | INS | GY | S | AI | K  | DSI | - |
| L. albus       | 258 | QVLP | TIK | TS   | PK   | YGGV | ML   | WN | GF  | ND | I | Q  | T  | GY  | S |
| C. sativus     | 258 | QVLP | TIK | AS   | SN   | YGGV | ML   | WS | --  | K  | F | DN | GY | S   | I |
| N. rafflesiana | 259 | QVLP | SI  | R    | AS   | SK   | YGGV | ML | WS  | -- | K | Y  | DN | GY  | S |
| B. vulgaris    | 260 | QVLP | TIK | GS   | AK   | YGGV | ML   | WS | --  | K  | Y | D  | S  | GY  | S |
| V. vinifera    | 266 | Q    | I   | L    | P    | V    | I    | K  | R   | S  | P | K  | Y  | G   | G |
| O. sativa      | 269 | K    | V   | L    | P    | V    | V    | K  | K   | S  | P | K  | Y  | G   | G |
| consensus      | 271 | *    | *   | *    | *    | *    | *    | *  | *   | *  | * | *  | *  | *   | * |

Fig. S1
